# Supplementary material for: Supramolecular Association between γ-Cyclodextrin and Preyssler-Type Polyoxotungstate
Source: MDPI journal article supplement (doi:10.3390/molecules26175126), 2021-08-24
Supplement: s1 [file s1]

# Supramolecular Association Between $\gamma$ -Cyclodextrin and Preyssler-Type Polyoxotungstate

Nathalie Leclerc,<sup>a,\*</sup> Mohamed Haouas,<sup>a</sup> Clément Falaise,<sup>a</sup> Serge Al Bacha,<sup>a,b</sup> Loïc Assaud<sup>b</sup> and Emmanuel Cadot<sup>a</sup>

<sup>a</sup> Institut Lavoisier de Versailles, UMR 8180 CNRS, UVSQ, Université Paris-Saclay, 78035 Versailles Cedex, France.

<sup>b</sup> Institut de Chimie Moléculaire et des Matériaux d'Orsay (ICMMO) – ERIIE, UMR 8182 CNRS, Université Paris-Saclay, 91400, Orsay, France.

## Supporting information

### Table of Contents

|           |                                                                                                        |           |
|-----------|--------------------------------------------------------------------------------------------------------|-----------|
| <b>1.</b> | <b>FT-IR Spectra .....</b>                                                                             | <b>S2</b> |
| <b>2.</b> | <b>Thermogravimetric analysis .....</b>                                                                | <b>S3</b> |
| <b>3.</b> | <b>Single crystal X-ray diffraction .....</b>                                                          | <b>S4</b> |
| 3.1.      | Selected crystallographic parameters of the single-crystal X-ray diffraction structural analysis ..... | S4        |
| 3.2.      | Structural views of POM•1CD arrangement .....                                                          | S5        |
| <b>4.</b> | <b>NMR data .....</b>                                                                                  | <b>S7</b> |
| 4.1.      | <sup>1</sup> H NMR titration .....                                                                     | S7        |
| 4.2.      | <sup>31</sup> P NMR .....                                                                              | S8        |
| <b>5.</b> | <b>Electrochemical impedance spectroscopy .....</b>                                                    | <b>S9</b> |
| 5.1.      | Warburg coefficient .....                                                                              | S9        |
| 5.2.      | EIS data .....                                                                                         | S9        |

## 1. FT-IR Spectra

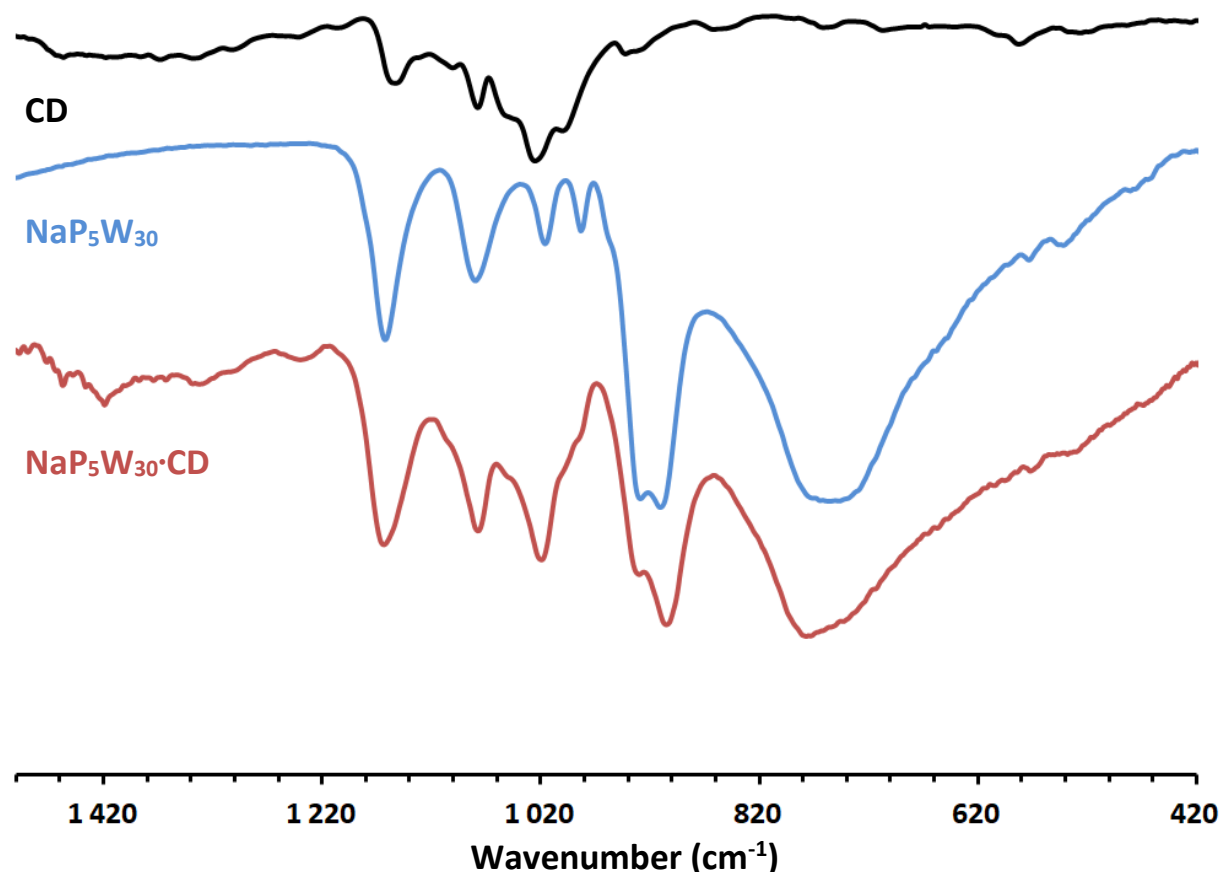

**Figure S1.** FT-IR spectrum of compound  $\text{NaP}_5\text{W}_{30}\cdot\text{CD}$ , in comparison with the spectra of the precursor  $\text{K}_{14}\text{Na}[\text{P}_5\text{W}_{30}\text{O}_{110}]\cdot 32\text{H}_2\text{O}$  ( $\text{NaP}_5\text{W}_{30}$ ) and of the  $\gamma$ -cyclodextrin (CD). From  $\text{NaP}_5\text{W}_{30}\cdot\text{CD}$ , the ratio of the bands of CD compared to that of the POM clearly increases (see the 1020 cm<sup>-1</sup> band).

## 2. Thermogravimetric analysis

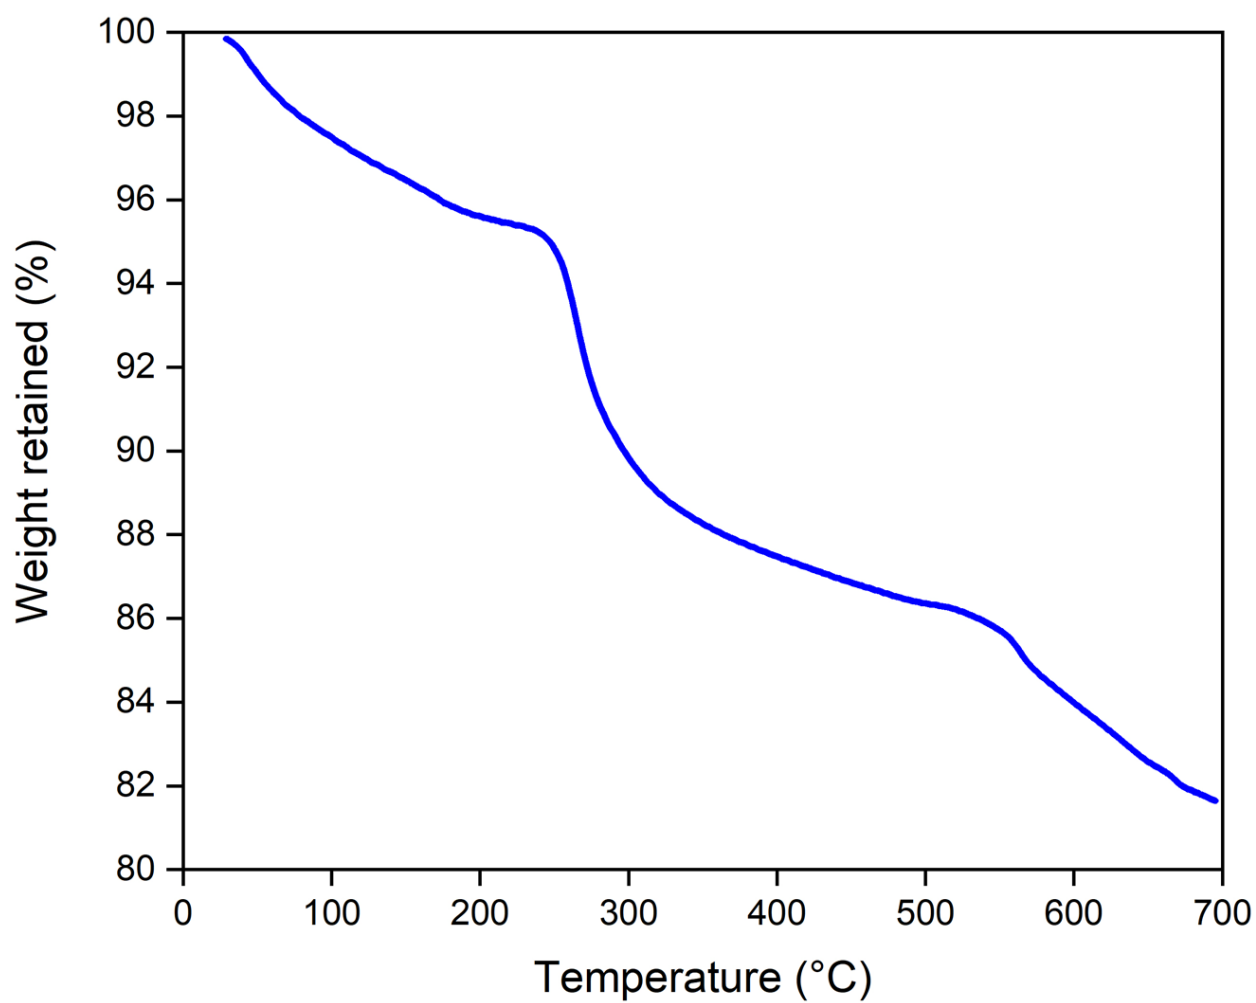

**Figure S2.** Thermogravimetric curve of freshly prepared  $\text{NaP}_5\text{W}_{30}\bullet\text{CD}$ .

### 3. Single crystal X-ray diffraction

#### 3.1. Selected crystallographic parameters of the single-crystal X-ray diffraction structural analysis

**Table S1.** Crystal data for NaP<sub>5</sub>W<sub>30</sub>•1CD.

| Identification code                                          | NaP <sub>5</sub> W <sub>30</sub> •1CD                                                                                |
|--------------------------------------------------------------|----------------------------------------------------------------------------------------------------------------------|
| Empirical formula                                            | C <sub>48</sub> H <sub>55</sub> K <sub>4.88</sub> Na <sub>6</sub> O <sub>185.25</sub> P <sub>5</sub> W <sub>30</sub> |
| Formula weight                                               | 9594.82                                                                                                              |
| Temperature/K                                                | 200                                                                                                                  |
| Crystal system                                               | Monoclinic                                                                                                           |
| Space group                                                  | <i>P</i> 2 <sub>1</sub>                                                                                              |
| <i>a</i> /Å                                                  | 40.522                                                                                                               |
| <i>b</i> /Å                                                  | 20.995                                                                                                               |
| <i>c</i> /Å                                                  | 25.108                                                                                                               |
| <i>α</i> /°                                                  | 90                                                                                                                   |
| <i>β</i> /°                                                  | 98.55                                                                                                                |
| <i>γ</i> /°                                                  | 90                                                                                                                   |
| Volume/Å <sup>3</sup>                                        | 21124.3                                                                                                              |
| <i>Z</i>                                                     | 4                                                                                                                    |
| $\rho_{\text{calc}}/\text{cm}^3$                             | 3.017                                                                                                                |
| $\mu/\text{mm}^{-1}$                                         | 16.521                                                                                                               |
| <i>F</i> (000)                                               | 17114.0                                                                                                              |
| Crystal size/mm <sup>3</sup>                                 | 0.15 × 0.12 × 0.1                                                                                                    |
| Radiation                                                    | MoK $\alpha$ ( $\lambda$ = 0.71073)                                                                                  |
| 2 $\theta$ range for data collection/°                       | 4.01 to 56.824                                                                                                       |
| Index ranges                                                 | -54 ≤ <i>h</i> ≤ 54                                                                                                  |
|                                                              | -28 ≤ <i>k</i> ≤ 28                                                                                                  |
|                                                              | -33 ≤ <i>l</i> ≤ 33                                                                                                  |
| Reflections collected                                        | 390618                                                                                                               |
| Independent reflections                                      | 105407                                                                                                               |
|                                                              | <i>R</i> <sub>int</sub> = 0.0726                                                                                     |
|                                                              | <i>R</i> <sub>sigma</sub> = 0.0603                                                                                   |
| Data/restraints/parameters                                   | 105407/62/2345                                                                                                       |
| Goodness-of-fit on <i>F</i> <sup>2</sup>                     | 1.049                                                                                                                |
| Final <i>R</i> indexes [ <i>I</i> ≥ 2 $\sigma$ ( <i>I</i> )] | <i>R</i> <sub>1</sub> = 0.0490                                                                                       |
|                                                              | <i>wR</i> <sub>2</sub> = 0.1182                                                                                      |
| Final <i>R</i> indexes [all data]                            | <i>R</i> <sub>1</sub> = 0.0546                                                                                       |
|                                                              | <i>wR</i> <sub>2</sub> = 0.1228                                                                                      |
| Largest diff. peak/hole / e Å <sup>-3</sup>                  | 3.95/-3.76                                                                                                           |
| Flack parameter                                              | 0.111(9)                                                                                                             |

### 3.2. Structural views of POM•1CD arrangement

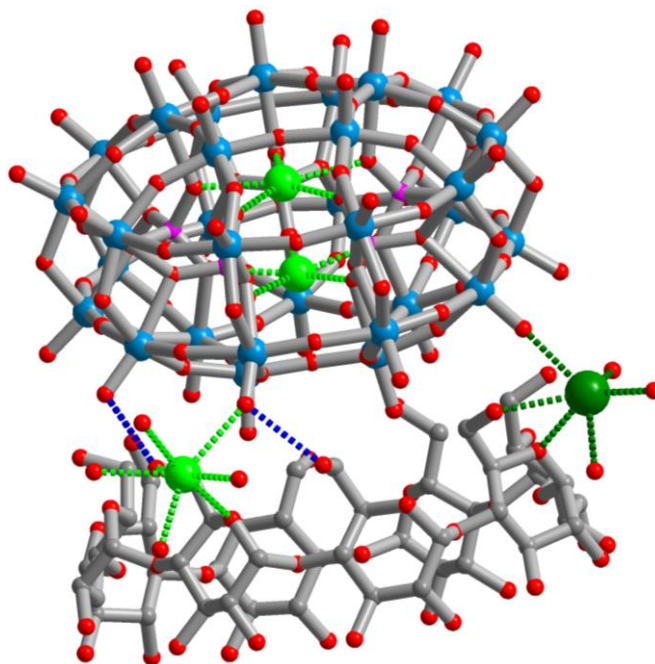

**Figure S3.** Structural representation of the **POM•1CD** arrangement showing the involvement of the potassium cations (dark-green spheres) and sodium cations (light-green spheres) within the POM••• $\gamma$ -CD interactions in addition to the hydrogen bonds (dotted blue sticks).

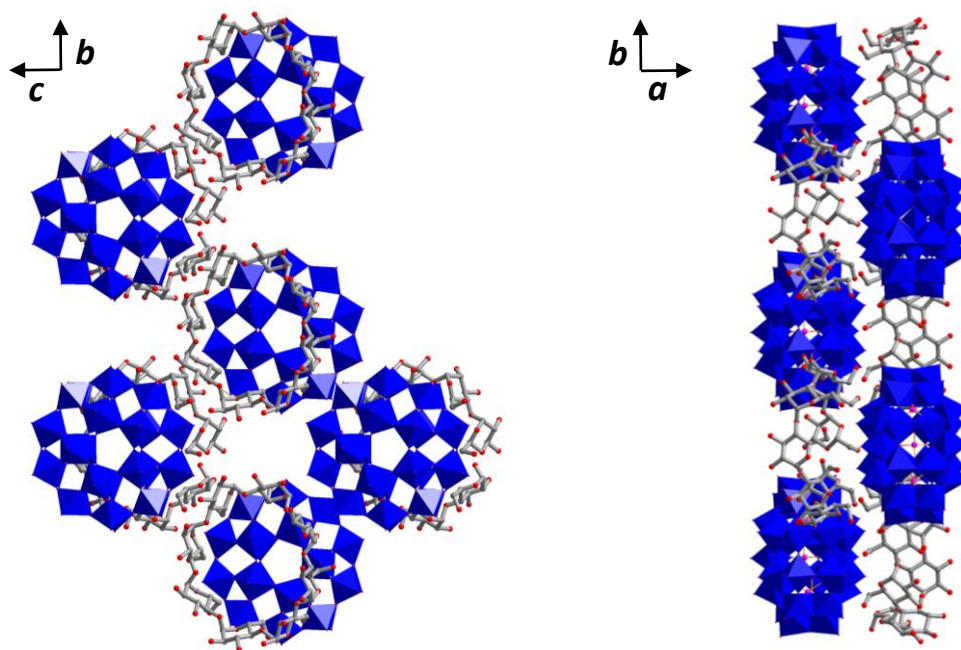

**Figure S4.** Representation of the  $\{\text{NaP}_5\text{W}_{30}\} \cdot 1\text{CD}$  structure showing chains of the POM and of the CD running along the  $a$  and  $c$  axes. The supramolecular host-guest assembly are alternately stacked through short and long intermolecular interactions involving the primary face of the  $\gamma$ -CD. These chains are mutually connected through the sodium/potassium counterions to give the monoclinic cell. Color code: blue polyhedral represent the W-O framework of the  $\{\text{NaP}_5\text{W}_{30}\}^{14-}$  POM; the cyclodextrin are represented by grey sticks.

## 4. NMR data

### 4.1. $^1\text{H}$ NMR titration

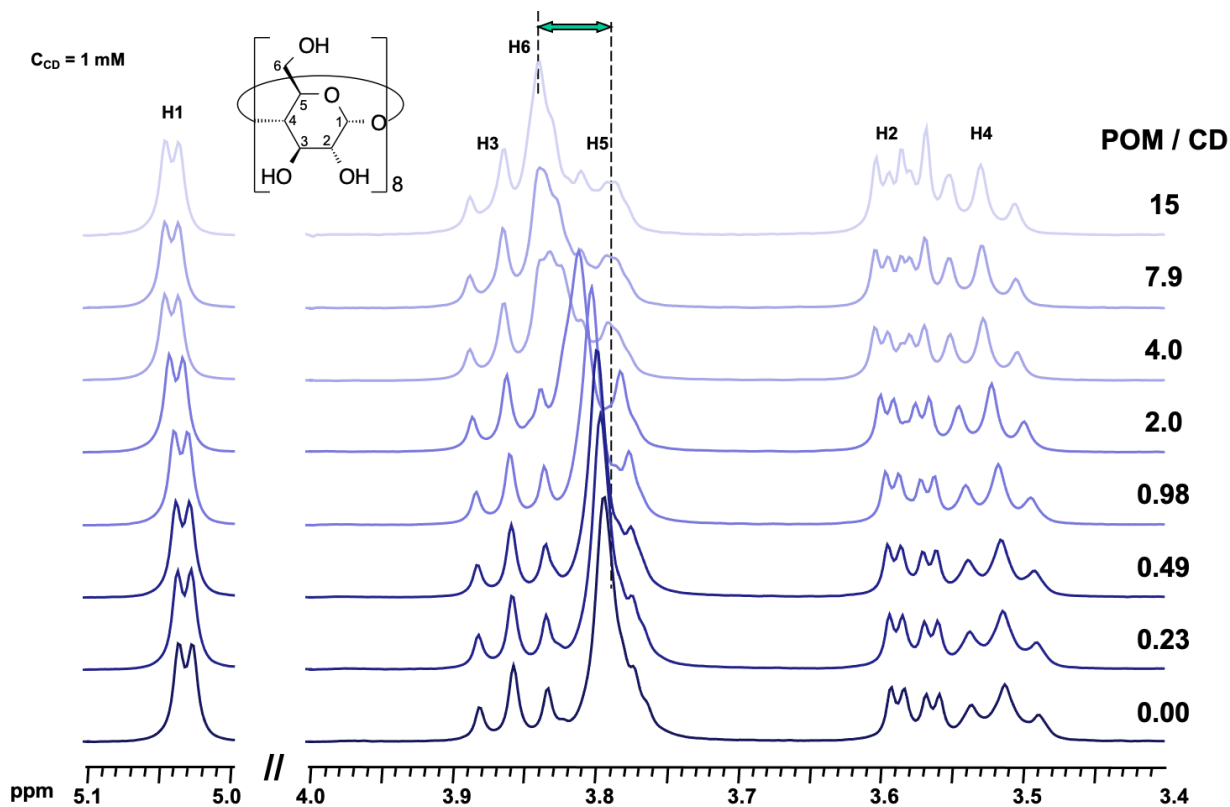

**Figure S5.**  $^1\text{H}$  NMR spectra of  $\gamma$ -CD aqueous solution (3 mM) containing variable amounts of  $\text{K}_{14}\text{Na}[\text{P}_5\text{W}_{30}\text{O}_{110}]$ , showing effect on signal  $\text{H}_6$  as a result of complex formation on the primary rim of the CD.

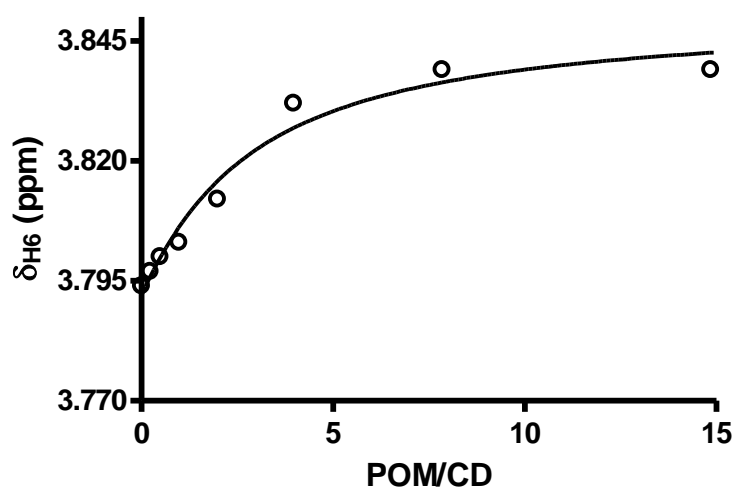

**Figure S6.**  $^1\text{H}$  NMR titration curve of  $\gamma$ -CD with the POM. A plot of the chemical shifts of the higher field  $\text{H}_6$  proton of the  $\gamma$ -CD as a function of POM/CD molar ratio was used to estimate the association constant  $K$  ( $430 \pm 60 \text{ M}^{-1}$ ) for the 1:1 complex.

## 4.2. $^{31}\text{P}$ NMR

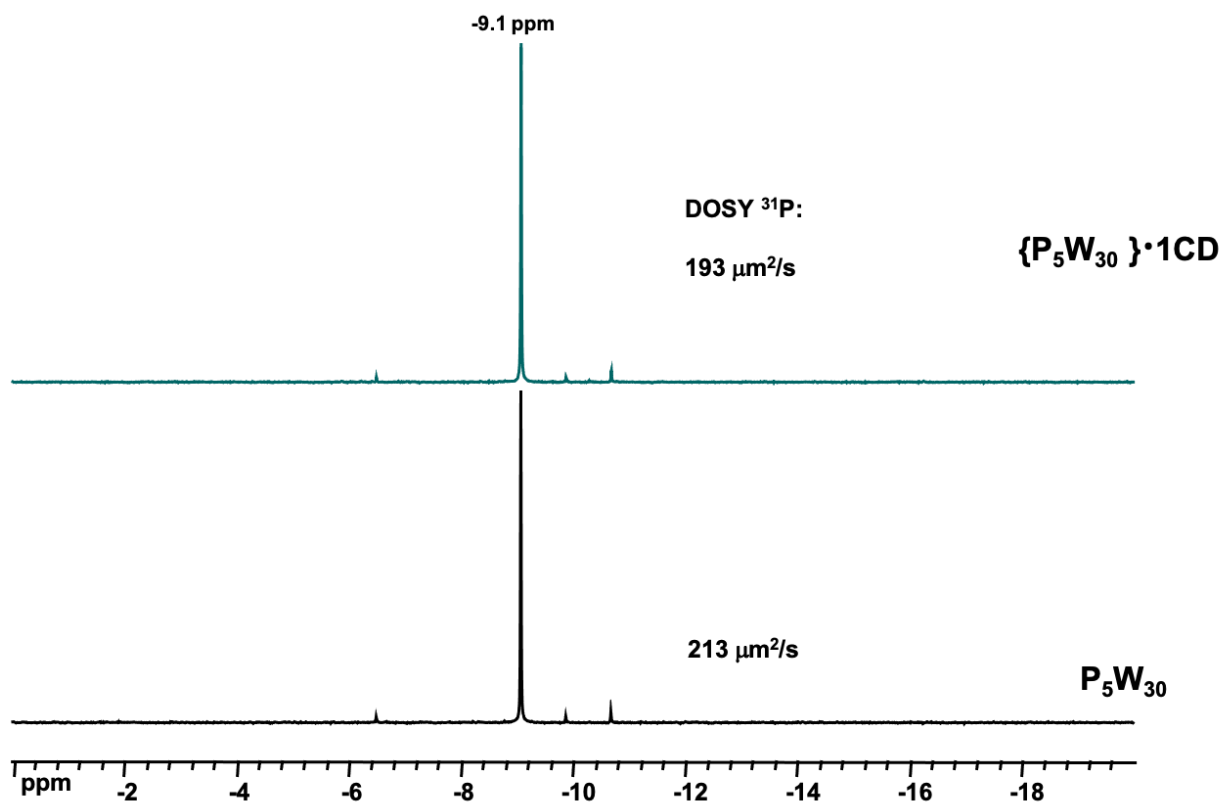

**Figure S7.**  $^{31}\text{P}$  NMR spectra of  $\text{K}_{14}\text{Na}[\text{P}_5\text{W}_{30}\text{O}_{110}]$  and  $\{\text{NaP}_5\text{W}_{30}\} \cdot \text{1CD}$  aqueous solutions showing no effect on the POM signal.



## 5. Electrochemical impedance spectroscopy

### 5.1. Warburg coefficient

Short Warburg impedance  $Z_w$  is defined as:

$$Z_w = \frac{\sigma_w}{(i\omega)^\beta} \tanh[(i\tau_w\omega)^\beta] \quad \text{Eq. S1}$$

With ZView software, the same impedance is calculated using:

$$Z_w = \frac{R_w}{(i\tau_w\omega)^\beta} \tanh[(i\tau_w\omega)^\beta] \quad \text{Eq. S2}$$

By comparing Eq. S1 to Eq. S2, Warburg coefficient  $\sigma_w$  is deduced as follows:

$$\sigma_w = \frac{R_w}{(\tau_w)^\beta} \quad \text{Eq. S3}$$

Given the fact that  $\beta$  was also fitted for EIS data analysis, the comparison of  $R_w$  and  $\tau_w$  values cannot be justified.

### 5.2. EIS data

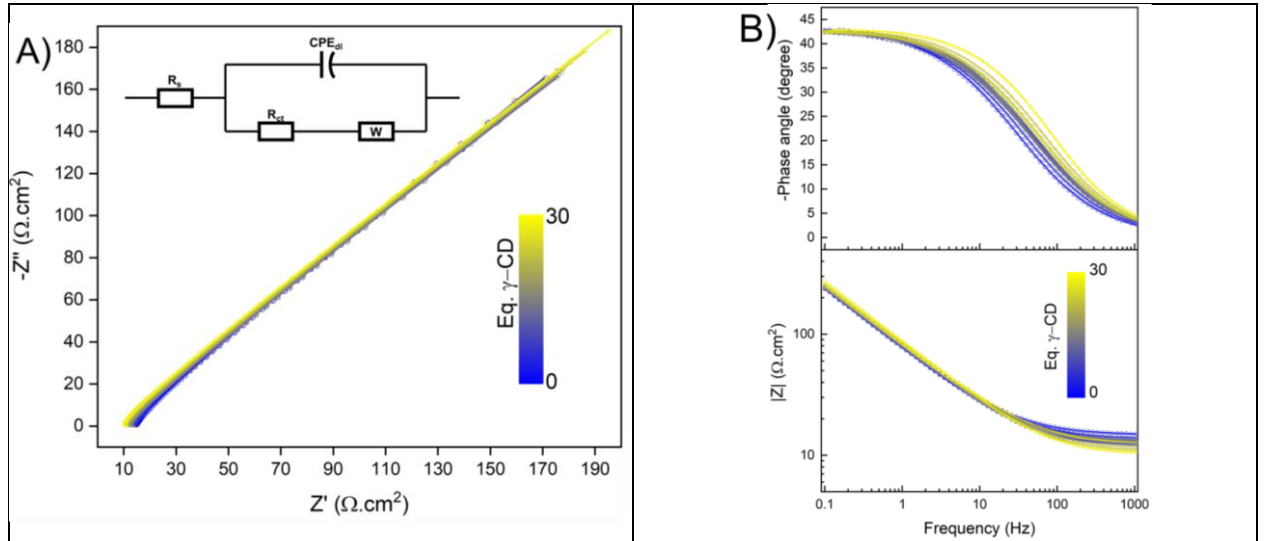

**Figure S8.** A) Nyquist diagram and B) Bode diagram of the  $\text{NaP}_5\text{W}_{30}$  anion (1 mmol.L<sup>-1</sup>, glassy carbon working electrode) in the presence of increasing amounts of  $\gamma$ -CD (from 0 to 30 equivalents). The experiments have been performed at -0.43 V vs Ag/AgCl in 50:50 (v:v) HCl (0.1 mol.L<sup>-1</sup>):NaCl (0.9 mol.L<sup>-1</sup>) aqueous solution.

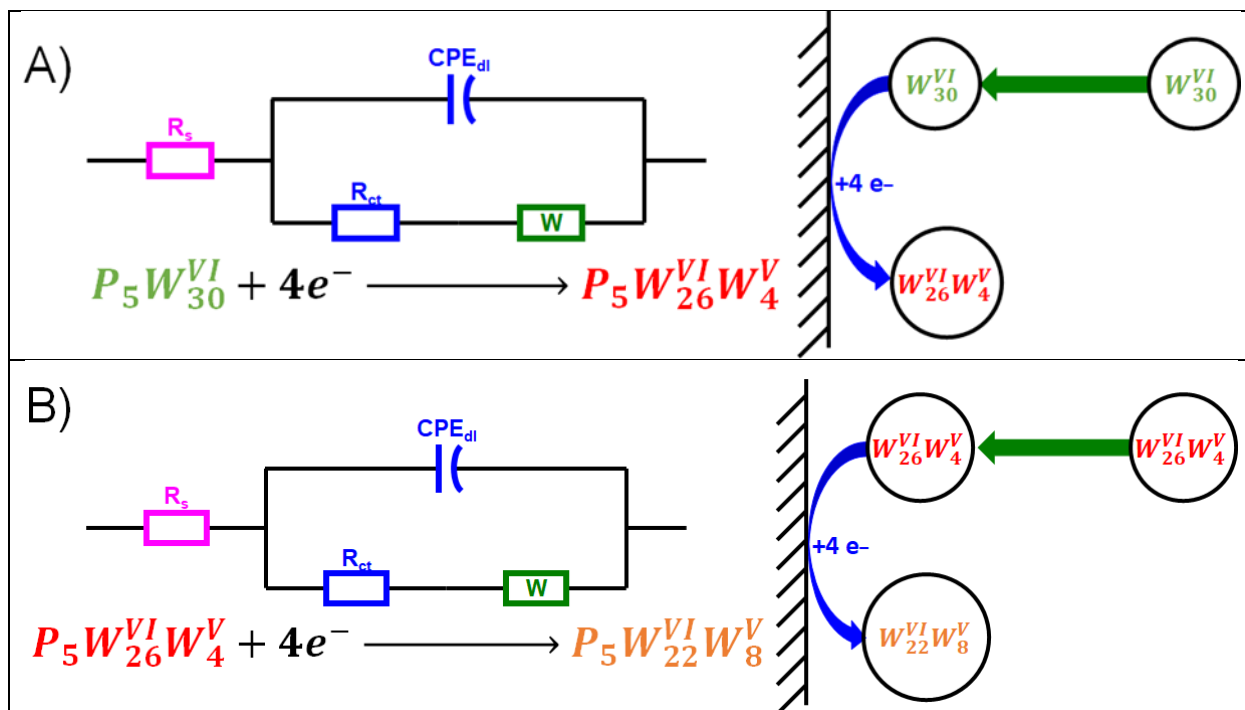

**Figure S9.** Correspondence of equivalent electric circuit to the proposed schematic mechanism of the electrochemical processes at A) -0.29 and B) -0.43V vs Ag/AgCl. (For better interpretation, the reader is referred to the online version).

**Table S2.** Electrochemical parameters calculated using ZView software for POM and POM-CD reduction reactions at A) -0.29 and B) -0.43 V *vs* Ag/AgCl.

| A)                  | Eq. $\gamma$ -CD | $R_s$ ( $\Omega \cdot \text{cm}^2$ ) | $Q$ ( $\text{mF} \cdot \text{cm}^{-2} \cdot \text{s}^{-\alpha}$ ) | $\alpha$ | $R_{ct}$ ( $\Omega \cdot \text{cm}^2$ ) | $R_w$ ( $\Omega \cdot \text{cm}^2 \cdot \text{s}^{-\beta}$ ) | $\tau_w$ (s) | $\beta$ |
|---------------------|------------------|--------------------------------------|-------------------------------------------------------------------|----------|-----------------------------------------|--------------------------------------------------------------|--------------|---------|
| First cathodic peak | 0                | 14.8                                 | 1.67                                                              | 0.740    | 24.2                                    | 921                                                          | 16.5         | 0.457   |
|                     | 0.5              | 13.7                                 | 1.32                                                              | 0.761    | 18.3                                    | 883                                                          | 16.8         | 0.460   |
|                     | 1                | 12.1                                 | 1.19                                                              | 0.771    | 18.6                                    | 1844                                                         | 79.7         | 0.468   |
|                     | 1.5              | 12.6                                 | 0.88                                                              | 0.801    | 17.0                                    | 1871                                                         | 81.8         | 0.475   |
|                     | 2                | 13.2                                 | 0.95                                                              | 0.790    | 15.2                                    | 1831                                                         | 81.0         | 0.472   |
|                     | 3                | 12.9                                 | 0.87                                                              | 0.799    | 14.7                                    | 1753                                                         | 72.0         | 0.473   |
|                     | 4                | 12.2                                 | 0.80                                                              | 0.809    | 14.0                                    | 1786                                                         | 75.8         | 0.476   |
|                     | 5                | 11.6                                 | 0.73                                                              | 0.820    | 13.5                                    | 1794                                                         | 75.5         | 0.478   |
|                     | 10               | 10.9                                 | 0.61                                                              | 0.841    | 13.2                                    | 1788                                                         | 67.7         | 0.482   |
|                     | 20               | 10.6                                 | 0.55                                                              | 0.851    | 14.1                                    | 1793                                                         | 65.4         | 0.483   |
|                     | 30               | 10.5                                 | 0.51                                                              | 0.859    | 14.6                                    | 1833                                                         | 59.6         | 0.486   |

| B)                   | Eq. $\gamma$ -CD | $R_s$ ( $\Omega \cdot \text{cm}^2$ ) | $Q$ ( $\text{mF} \cdot \text{cm}^{-2} \cdot \text{s}^{-\alpha}$ ) | $\alpha$ | $R_{ct}$ ( $\Omega \cdot \text{cm}^2$ ) | $R_w$ ( $\Omega \cdot \text{cm}^2 \cdot \text{s}^{-\beta}$ ) | $\tau_w$ (s) | $\beta$ |
|----------------------|------------------|--------------------------------------|-------------------------------------------------------------------|----------|-----------------------------------------|--------------------------------------------------------------|--------------|---------|
| Second cathodic peak | 0                | 14.7                                 | 2.03                                                              | 0.737    | 30.5                                    | 1679                                                         | 68.3         | 0.457   |
|                      | 0.5              | 13.6                                 | 1.84                                                              | 0.742    | 26.3                                    | 1809                                                         | 87.9         | 0.456   |
|                      | 1                | 12.0                                 | 1.59                                                              | 0.759    | 20.8                                    | 1740                                                         | 86.8         | 0.455   |
|                      | 1.5              | 12.6                                 | 1.57                                                              | 0.756    | 21.2                                    | 1939                                                         | 102.9        | 0.456   |
|                      | 2                | 13.1                                 | 1.56                                                              | 0.754    | 20.0                                    | 1845                                                         | 97.5         | 0.455   |
|                      | 3                | 12.8                                 | 1.60                                                              | 0.749    | 21.9                                    | 1877                                                         | 98.3         | 0.454   |
|                      | 4                | 12.2                                 | 1.53                                                              | 0.753    | 20.7                                    | 1807                                                         | 89.1         | 0.456   |
|                      | 5                | 11.5                                 | 1.41                                                              | 0.762    | 18.5                                    | 1825                                                         | 91.5         | 0.457   |
|                      | 10               | 10.8                                 | 1.24                                                              | 0.775    | 16.0                                    | 1857                                                         | 94.0         | 0.460   |
|                      | 20               | 10.4                                 | 1.11                                                              | 0.786    | 15.7                                    | 1810                                                         | 82.2         | 0.463   |
|                      | 30               | 10.2                                 | 0.97                                                              | 0.800    | 14.8                                    | 1787                                                         | 78.9         | 0.466   |
